# Supplementary material for: 3D bioprinting spatiotemporally defined patterns of growth factors to tightly control tissue regeneration
Source: PubMed Central journal article supplement — Sci Adv. 2020 Aug 14;6(33):eabb5093. doi: 10.1126/sciadv.abb5093 (PMC7428335; doi:10.1126/sciadv.abb5093), 2020-08-14
Supplement: abb5093_SM.pdf [file abb5093_SM.pdf]

## Supplementary Materials for

### **3D bioprinting spatiotemporally defined patterns of growth factors to tightly control tissue regeneration**

Fiona E. Freeman, Pierluca Pitacco, Lieke H. A. van Dommelen, Jessica Nulty, David C. Browe, Jung-Youn Shin, Eben Alsberg, Daniel J. Kelly\*

\*Corresponding author. Email: [kellyd9@tcd.ie](mailto:kellyd9@tcd.ie)

Published 14 August 2020, *Sci. Adv.* **6**, eabb5093 (2020)  
DOI: 10.1126/sciadv.abb5093

#### **This PDF file includes:**

Figs. S1 to S5

## Supplementary Materials:

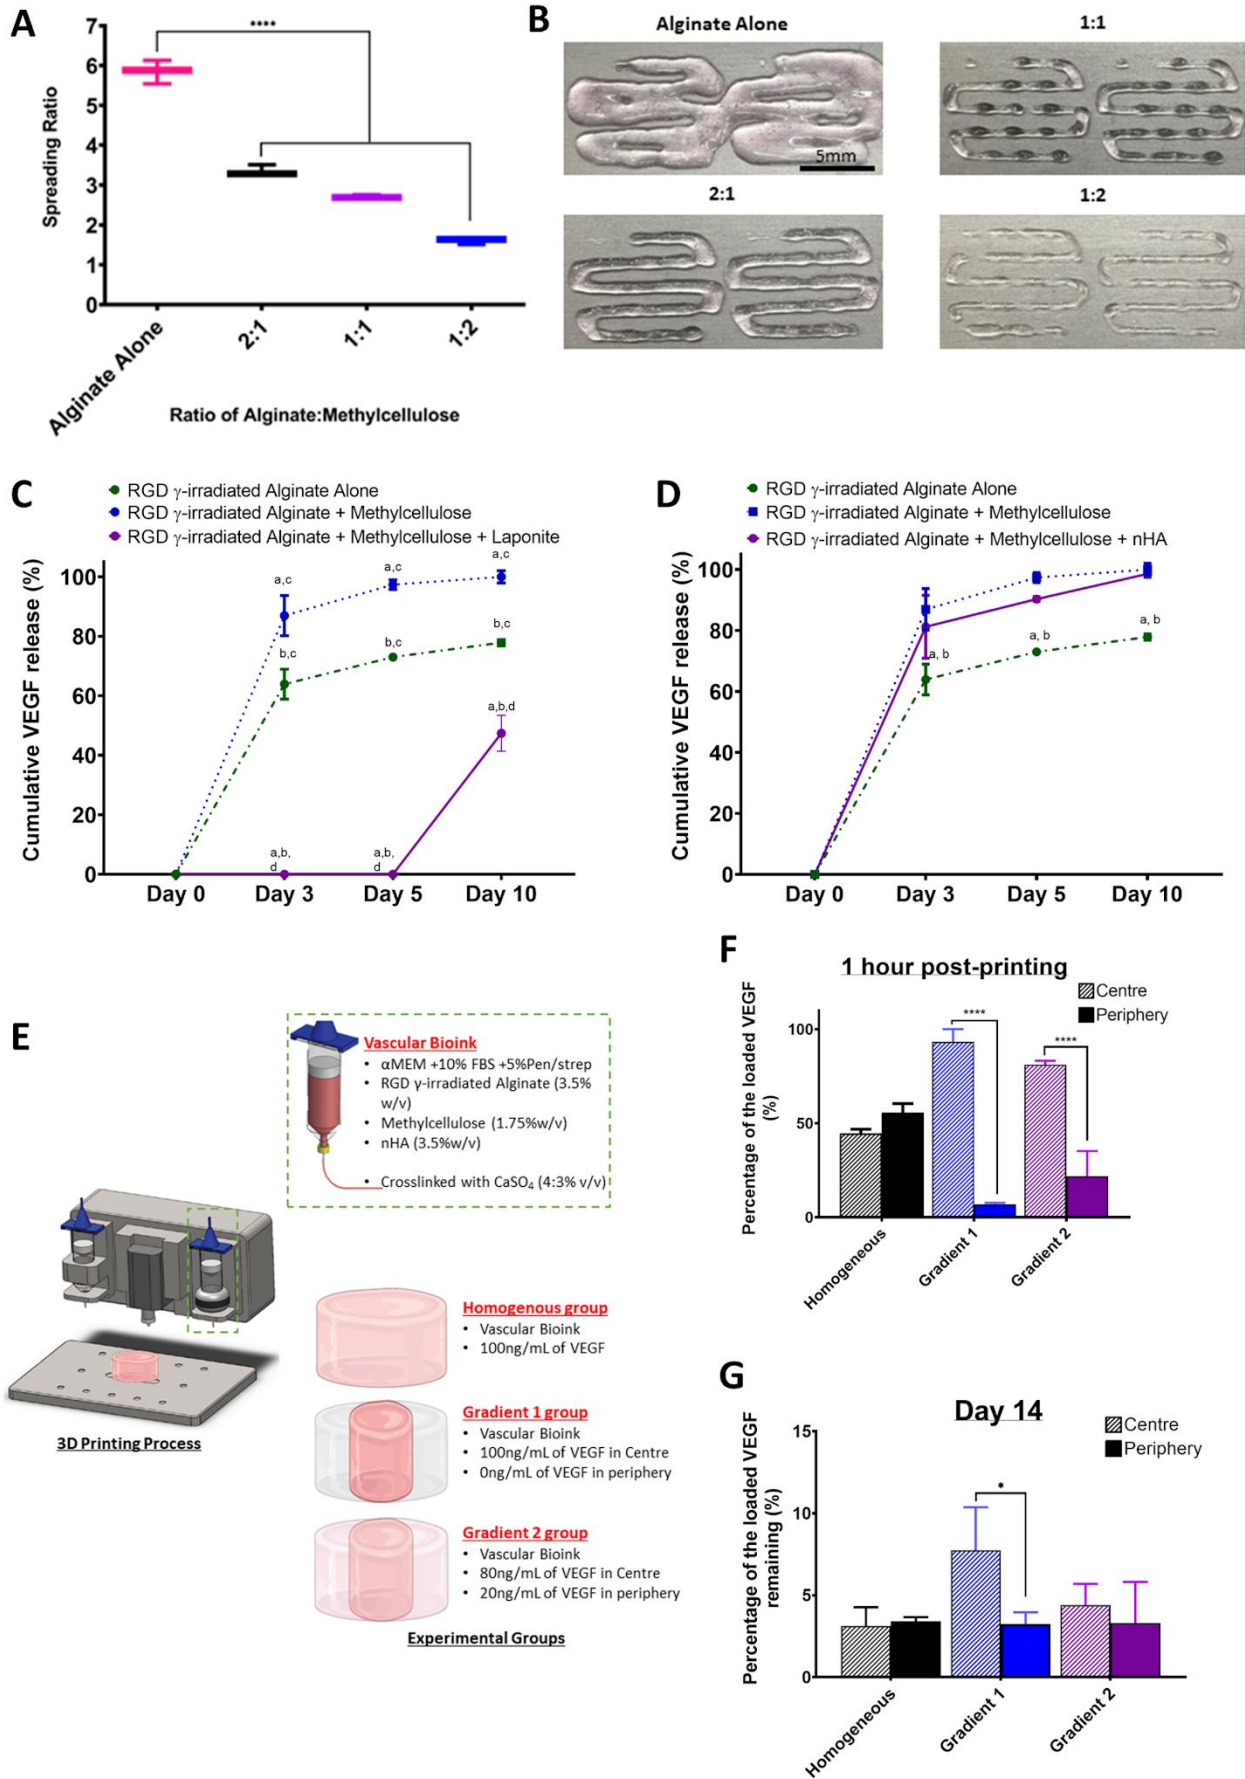

**Supplementary Fig. 1. Development of growth factor releasing bioinks.** (A) Spreading Ratio for RGD  $\gamma$ -irradiated alginate alone and various ratios of RGD  $\gamma$ -irradiated alginate to methylcellulose. Error bars denote standard deviation, \*\*\* $p < 0.001$ ,  $n = 6$ . (B) Representative images of the design pattern used to determine spreading ratios of the bioinks. (C) Cumulative release of VEGF into the media after the addition of Laponite. <sup>a</sup> $p < 0.05$  vs. RGD  $\gamma$ -irradiated alginate, <sup>b</sup> $p < 0.05$  vs. RGD  $\gamma$ -5 irradiated alginate + methylcellulose, <sup>c</sup> $p < 0.05$  vs. RGD  $\gamma$ -irradiated alginate + methylcellulose + Laponite. (D) Cumulative release of VEGF into the media after the addition of nHA. <sup>a</sup> $p < 0.05$  vs. RGD  $\gamma$ -irradiated alginate, <sup>b</sup> $p < 0.05$  vs. RGD  $\gamma$ -irradiated alginate + methylcellulose, <sup>c</sup> $p < 0.05$  vs. RGD  $\gamma$ -irradiated alginate + methylcellulose + nHA. All error bars denote standard deviation,  $n = 6$ . (E) Schematic of the 3D printed scaffold and experimental groups. Construct design (8mm in diameter, 4 mm in height). (F) VEGF ELISA on the centre 10 and periphery of the 3D printed scaffolds 1 hour post printing and (G) after 14 days of *in vitro* culture. All error bars denote standard deviation, \* $p < 0.05$ , \*\*\*\* $p < 0.0001$ ,  $n = 6$ .

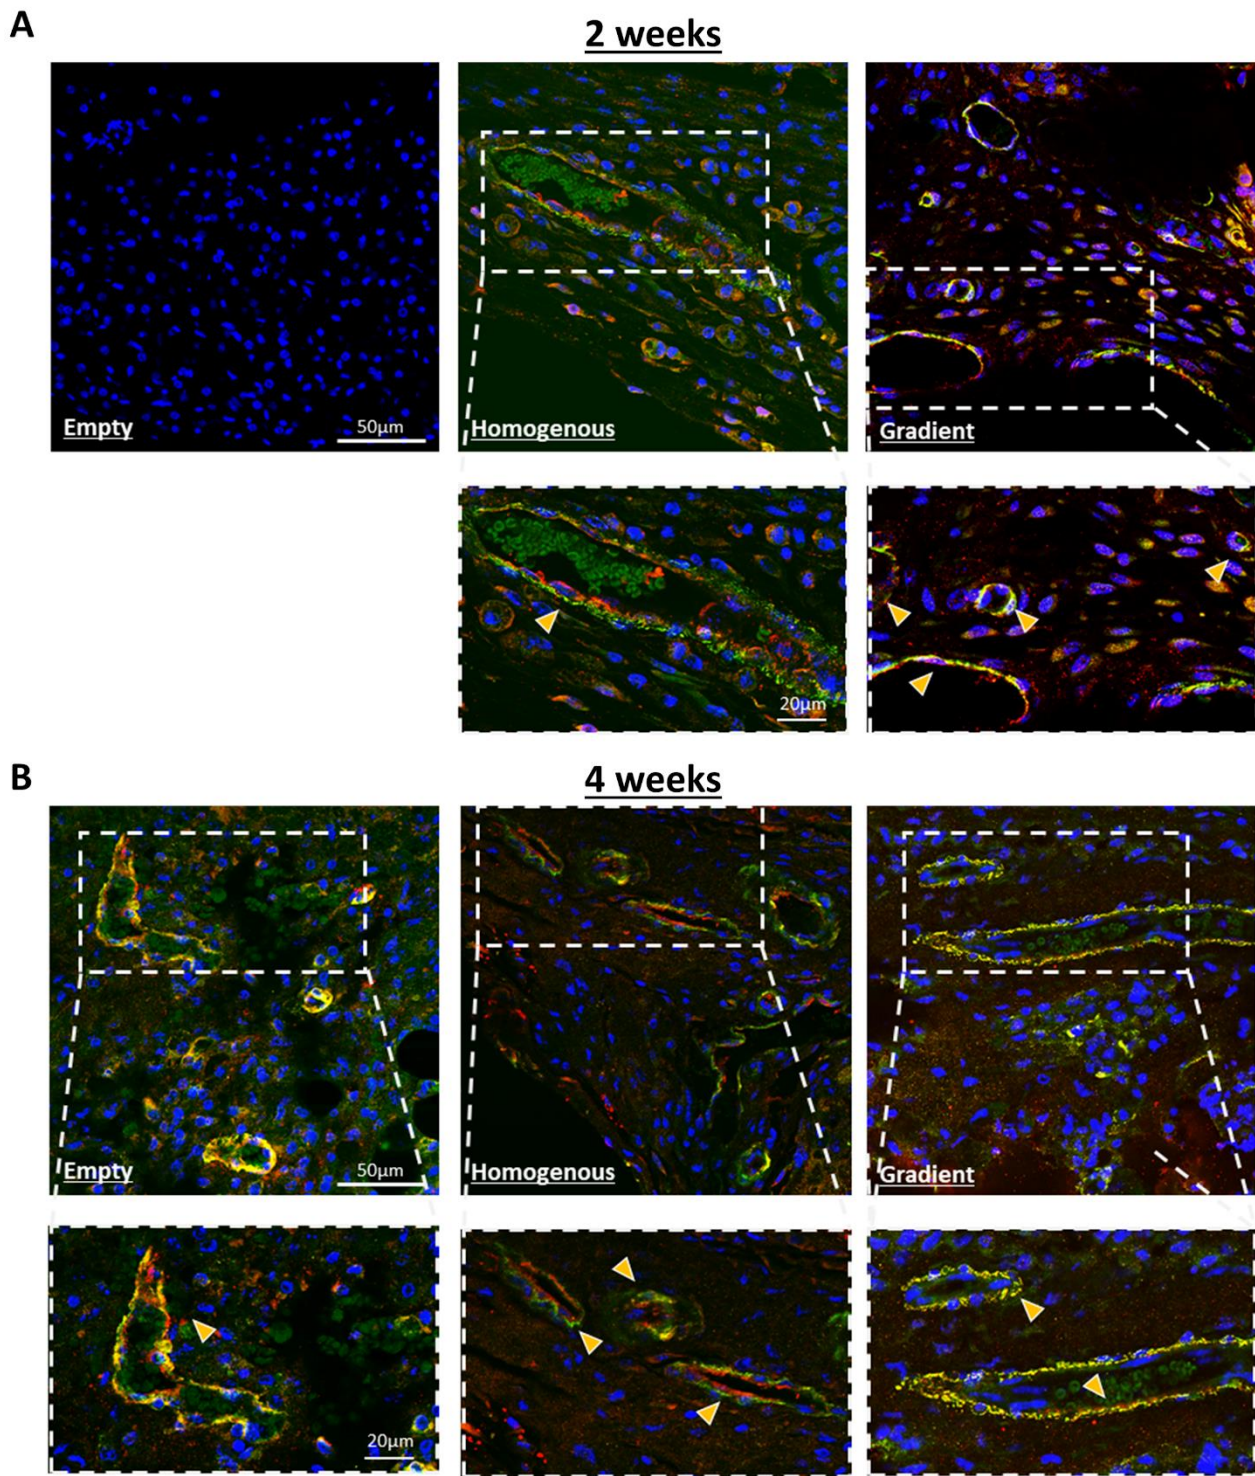

**Supplementary Fig. 2. Mature vessels present at 2 and 4 weeks in both Homogenous and VEGF gradient groups.** Immunohistochemical staining of nuclei (blue), vWF (red), and  $\alpha$ -smooth actin (green) of the experimental groups at (A) 2 and (B) 4 weeks post-implantation. Images taken at 20X and 40X. Yellow arrows denote vessels with  $\alpha$ -smooth actin and vWF dual staining.

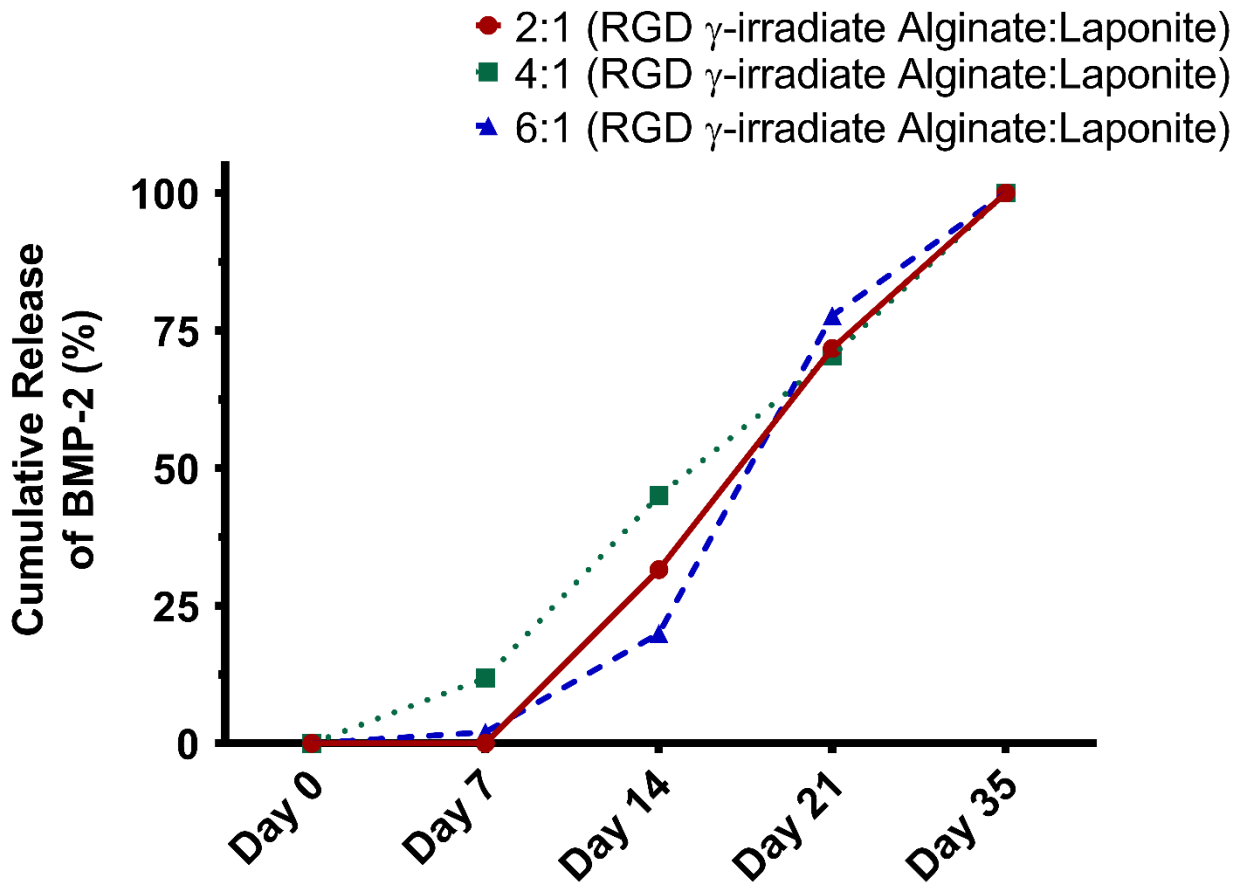

Supplementary Fig. 3. Cumulative release of BMP-2 into the media of varying w/w ratio of Alginate to Laponite. Error bars denote standard deviation,  $n=4$ .

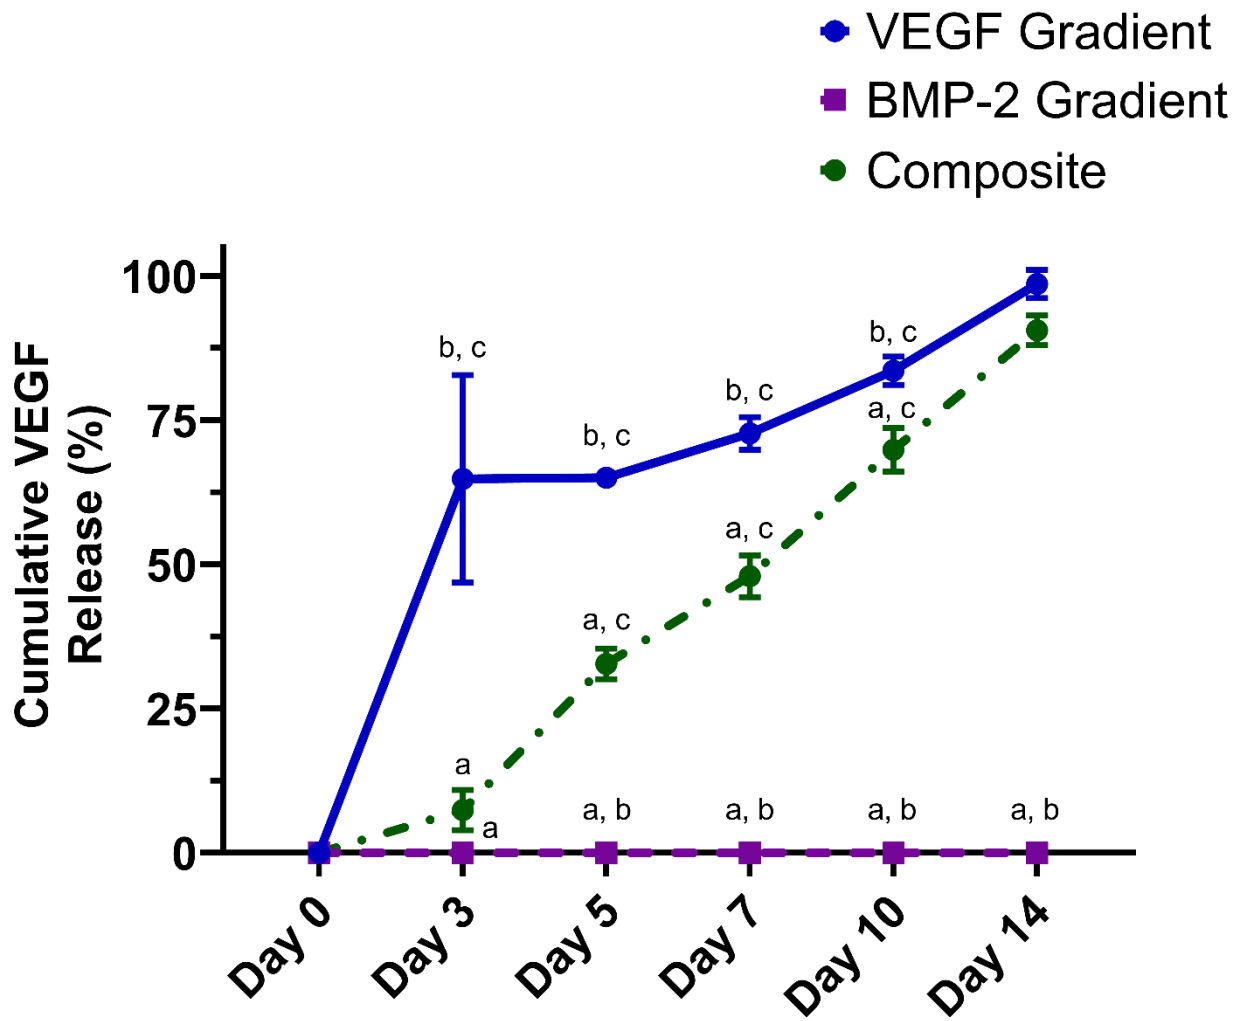

**Supplementary Fig. 4. Cumulative release of VEGF into the media of the three different experimental groups.** Error bars denote standard deviation, <sup>a</sup> $p < 0.05$  vs. VEGF Gradient, <sup>b</sup> $p < 0.05$  vs. Composite, <sup>c</sup> $p < 0.05$  vs. BMP-2 Gradient,  $n = 6$

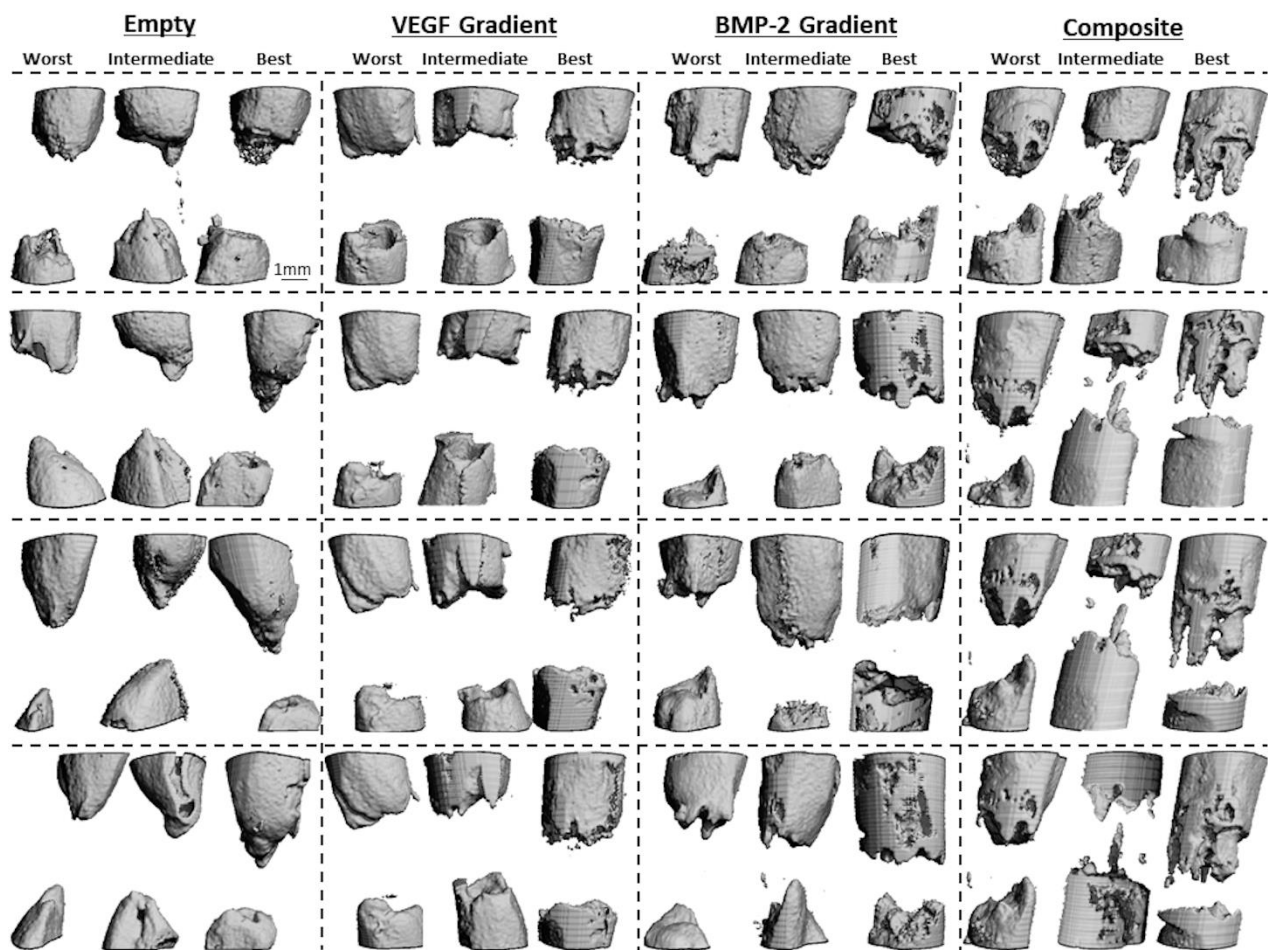

**Supplementary Fig. 5. Bone regeneration over time, as determined by *in vivo*  $\mu$ CT analysis.** 3D reconstructions of the best, intermediate and worst healers from all four groups at all-time points.
